# Supplementary material
Source: PubMed Central journal article supplement (PMC9404081)
Supplement: mmc1.pdf [file mmc1.pdf]

## 1. Supplementary Figures

A Fuzzy based Improved GWO clustering algorithm for predicting SARS-CoV-2 co-receptor protein

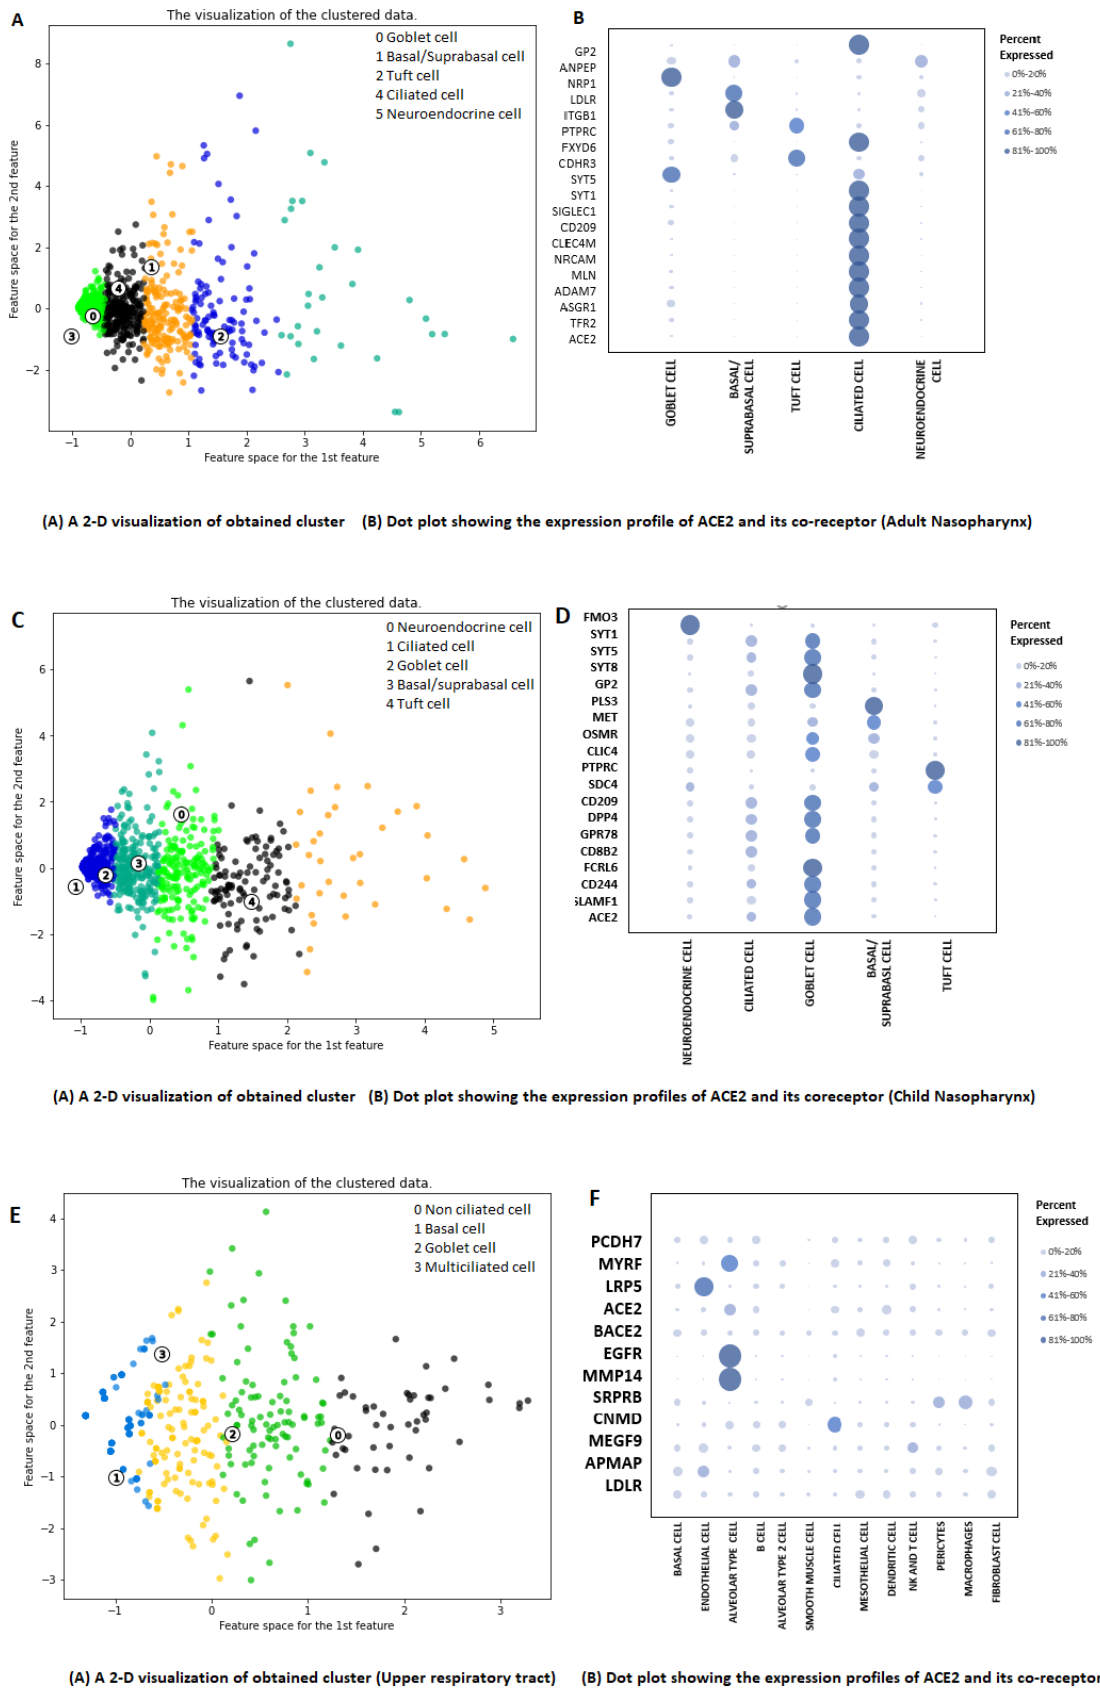

Fig. 1: Graphical visualization of clustering result obtained from the adult, child nasopharynx, upper respiratory tract and lung

A Fuzzy based Improved GWO clustering algorithm for predicting SARS-CoV-2 co-receptor protein

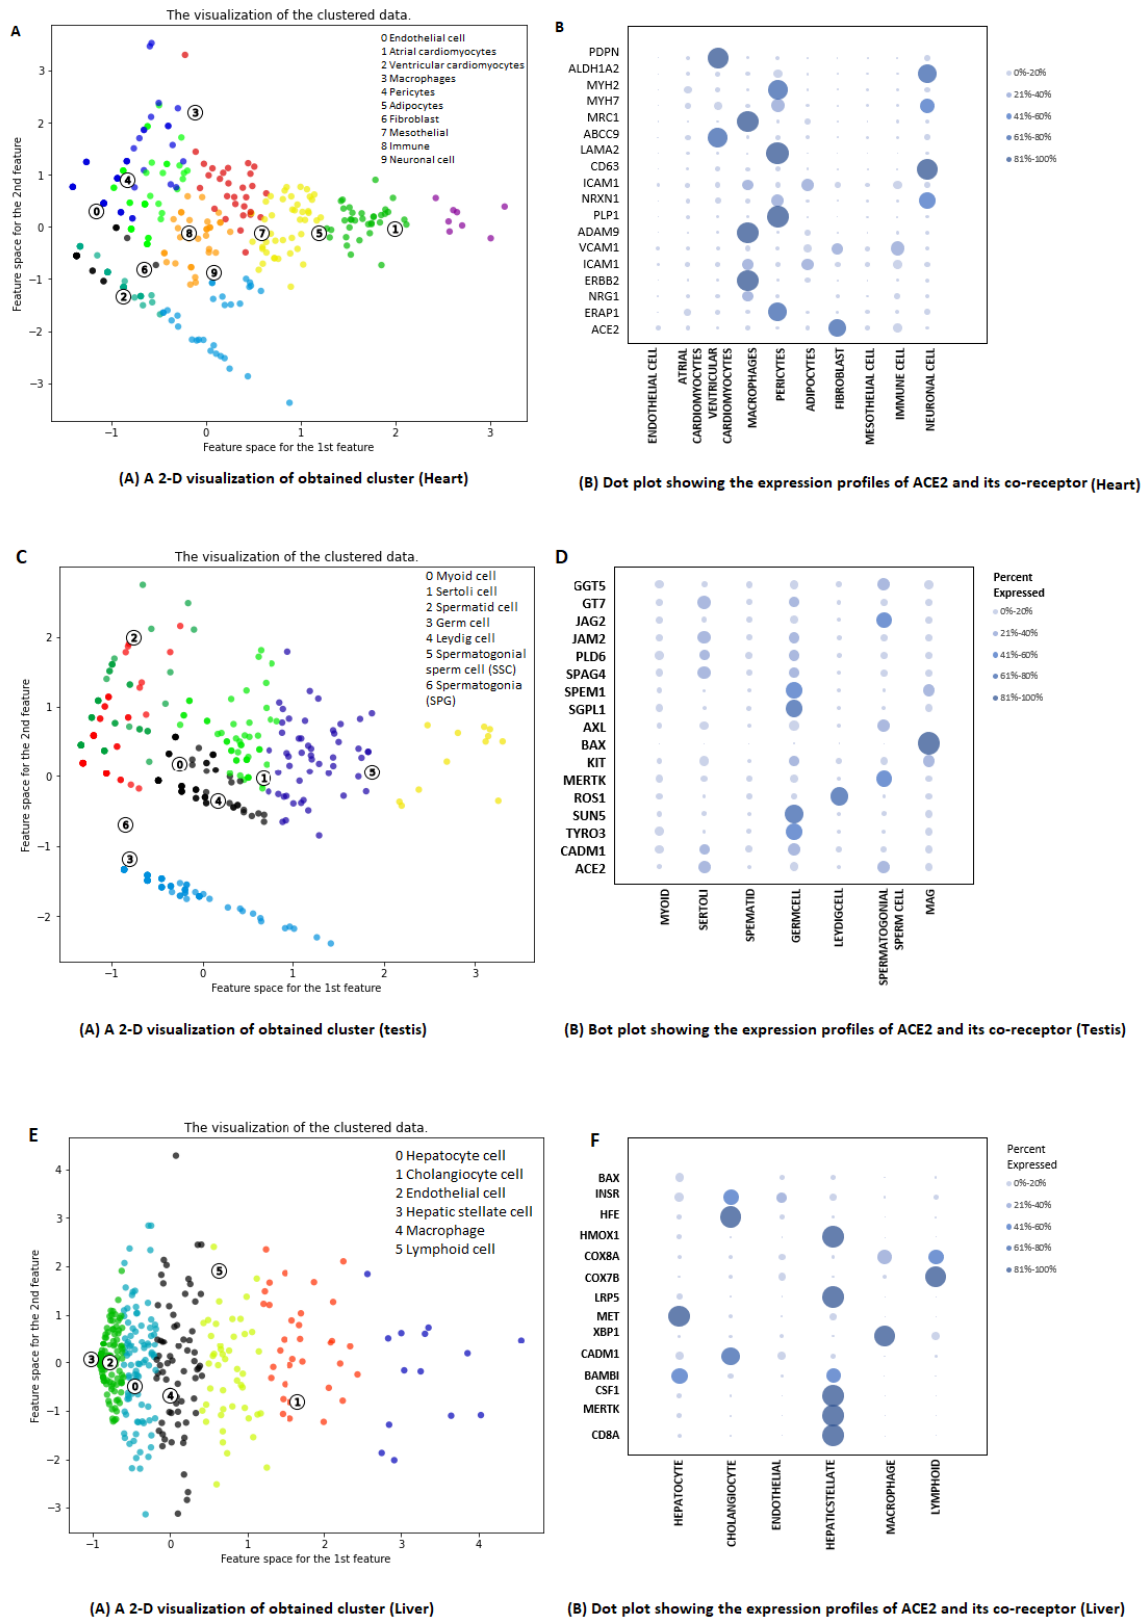

Fig. 2: Graphical visualization of clustering result obtained from the heart, testis and liver

A Fuzzy based Improved GWO clustering algorithm for predicting SARS-CoV-2 co-receptor protein

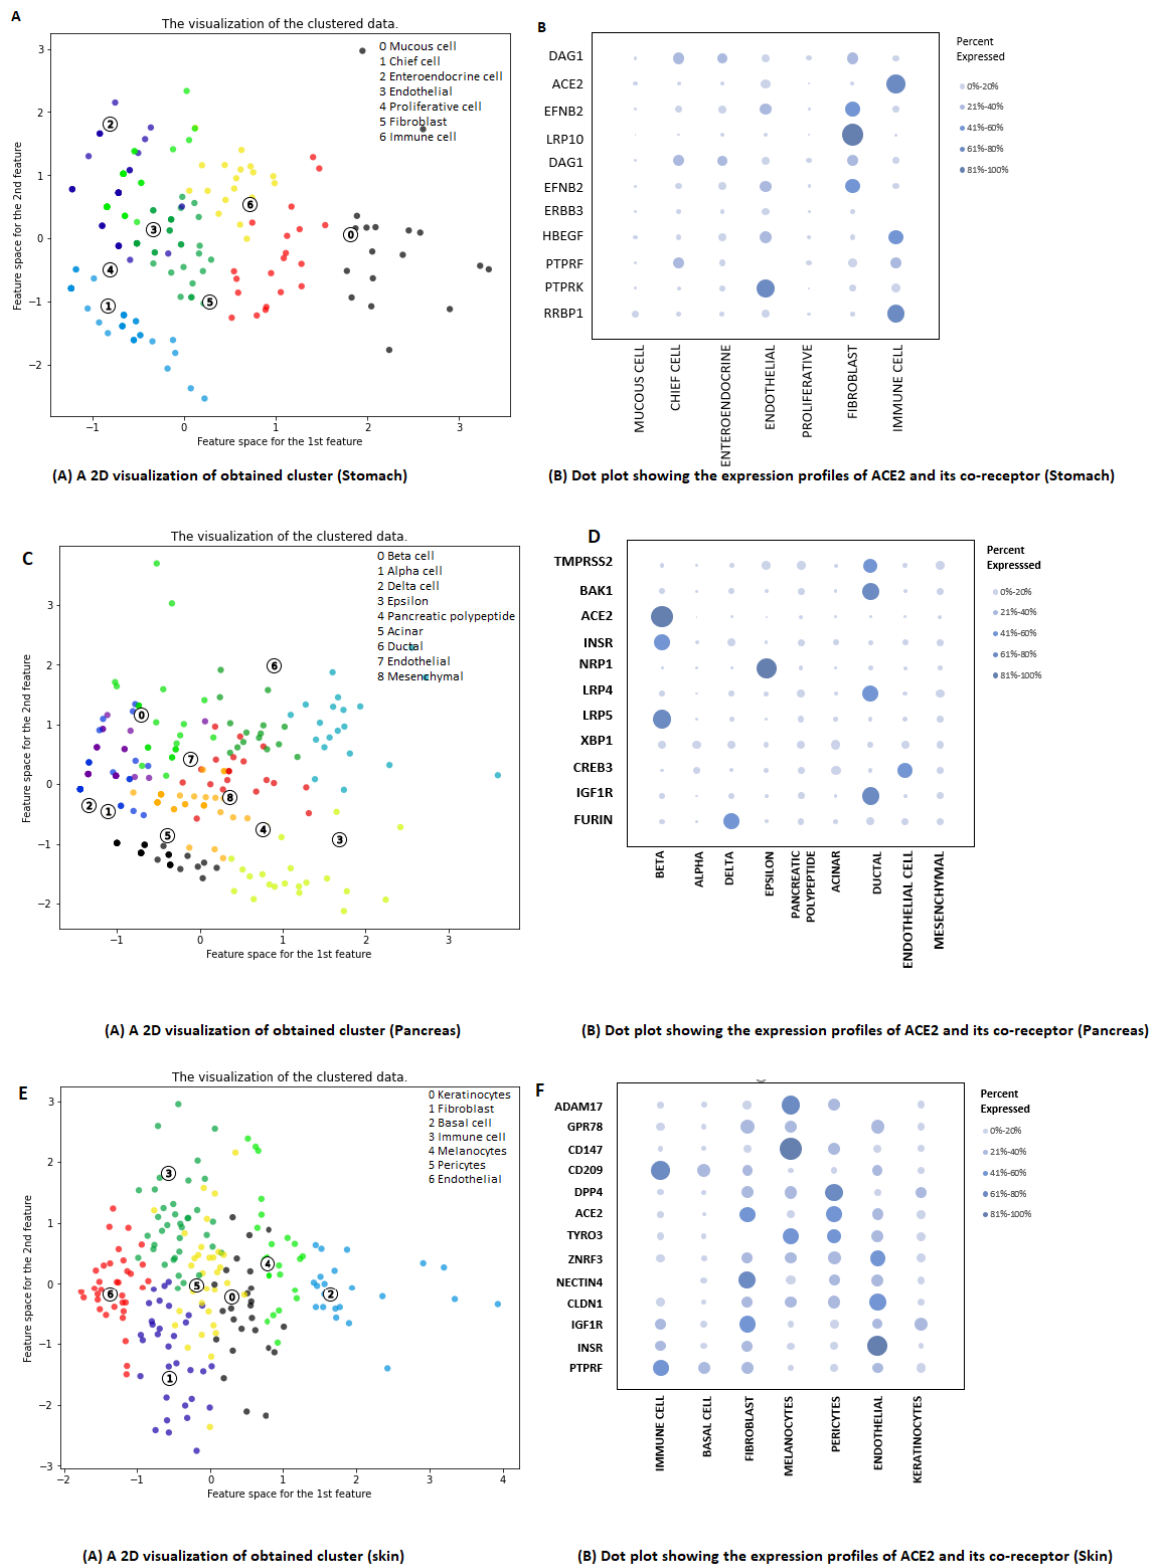

Fig. 3: Graphical visualization of clustering result obtained from stomach, pancreas and skin

A Fuzzy based Improved GWO clustering algorithm for predicting SARS-CoV-2 co-receptor protein

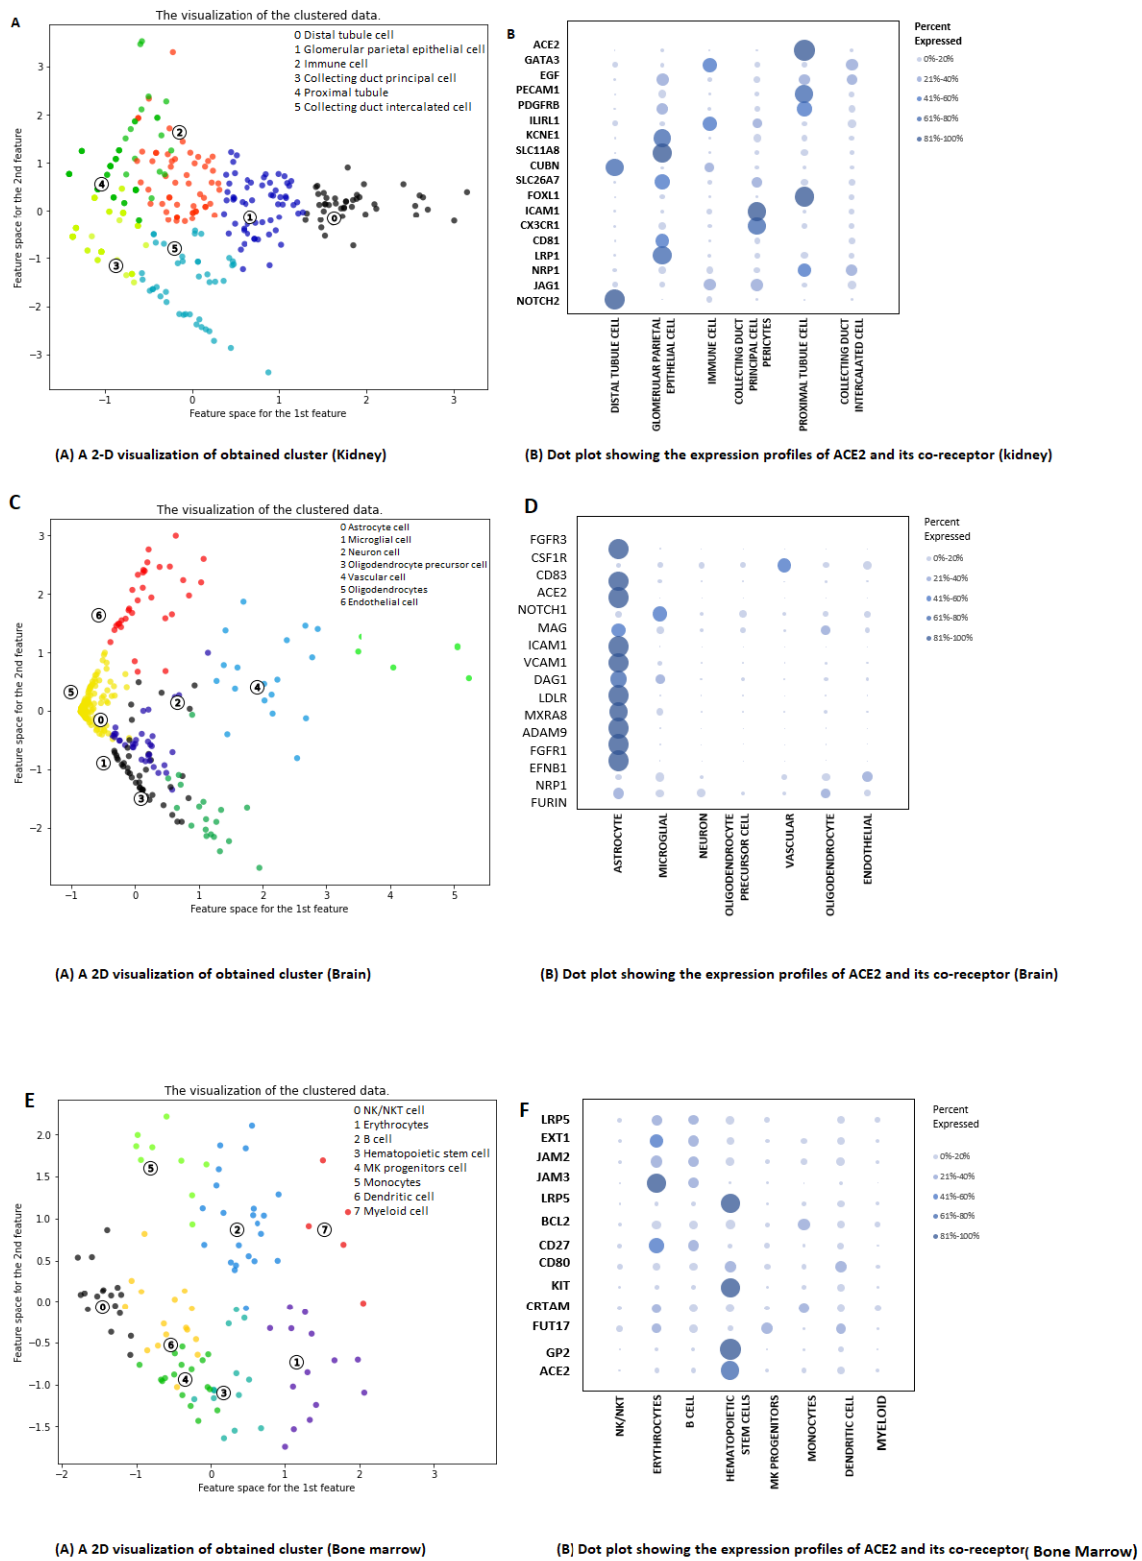

Fig. 4: Graphical visualization of clustering result obtained from kidney, brain and bonemarrow
